# Supplementary material for: Stochastic dynamics of Type-I interferon responses
Source: PubMed Central journal article supplement (PMC9629604; doi:10.1371/journal.pcbi.1010623), 2022-10-21
Supplement: pcbi.1010623.s001.pdf [file pcbi.1010623.s001.pdf]

# Supplementary Information - Stochastic Dynamics of Type-I Interferon Responses.

Benjamin D. Maier<sup>1\*</sup>, Luis U. Aguilera<sup>1,5\*</sup>, Sven Sahle<sup>1</sup>, Pascal Mutz<sup>3,4</sup>, Priyata Kalra<sup>1</sup>, Christopher Dächert<sup>2,4</sup>, Ralf Bartenschlager<sup>3,4</sup>, Marco Binder<sup>2</sup>, Ursula Kummer<sup>1</sup>.

<sup>1</sup> Department of Modeling of Biological Processes, COS Heidelberg / Bioquant, Heidelberg University, Heidelberg, Germany.

<sup>2</sup> Research Group “Dynamics of early viral infection and the innate antiviral response”, German Cancer Research Center (DKFZ), Heidelberg, Germany.

<sup>3</sup> Division Virus-Associated Carcinogenesis, German Cancer Research Center (DKFZ), Heidelberg, Germany.

<sup>4</sup> Department for Infectious Diseases, Molecular Virology, Medical Faculty, Heidelberg University, Heidelberg, Germany.

<sup>5</sup> Now at: Department of Chemical and Biological Engineering and School of Biomedical Engineering, Colorado State University, Fort Collins, CO, USA

\* Equally contributing authors.

## Index

|                                                                      |              |
|----------------------------------------------------------------------|--------------|
| <b>A Experimental data</b>                                           | <b>SI-2</b>  |
| A.1 IFN treatments and Flow cytometry analysis . . . . .             | SI-2         |
| <b>B Modeling biological systems</b>                                 | <b>SI-4</b>  |
| B.1 Stochastic COPASI Model . . . . .                                | SI-4         |
| B.2 Stochastic modeling . . . . .                                    | SI-7         |
| B.3 Stochastic simulations . . . . .                                 | SI-8         |
| B.4 Statistical moments . . . . .                                    | SI-9         |
| <b>C Parameter estimation strategy</b>                               | <b>SI-10</b> |
| C.1 Integrating experimental data and model dynamics . . . . .       | SI-11        |
| C.1.1 Time course data . . . . .                                     | SI-11        |
| C.1.2 Flow cytometry data . . . . .                                  | SI-11        |
| C.2 Comparing deterministic model and cell population data . . . . . | SI-12        |
| C.3 Fitting the stochastic system to flow cytometry data . . . . .   | SI-12        |
| C.4 Parameter searches . . . . .                                     | SI-15        |
| C.5 Parameter estimation results . . . . .                           | SI-17        |
| <b>D Effect of extrinsic noise in the signaling pathway</b>          | <b>SI-19</b> |
| <b>E Promoter analysis for MxA and IFIT1</b>                         | <b>SI-22</b> |
| <b>F Basal state</b>                                                 | <b>SI-24</b> |
| <b>G Effect of nucleus sizes on stochastic dynamics</b>              | <b>SI-24</b> |
| <b>H Abbreviations</b>                                               | <b>SI-26</b> |

## 1 A Experimental data

2 The data describes the expression of MxA and IFIT1 after IFN- $\alpha$  stimulation in a popu-  
 3 lation of Huh7.5 cells. The experiments were done in the following way: First, cells were  
 4 transfected with a BAC (Bacterial Artificial Chromosome) containing the studied ISGs  
 5 (mx<sub>a</sub> and ifit1) fused with the reporter eGFP genes. Subsequently cultures were treated  
 6 with different concentrations of human IFN- $\alpha$ . Cells were seeded and left to attach for  
 7 24 h. Then, treatment started for 32 h. until all cells including non-treated ones were  
 8 harvested at the same time point, fixed with 2% PFA to stop further protein expression  
 9 and applied to flow cytometry. Then, fluorescence in the cultures was monitored using  
 10 flow cytometry (Figs A and B). We tested the temporal IFN response at time points 8,  
 11 12, 16, 20 and 32 hours (Fig C).

12

### 13 A.1 IFN treatments and Flow cytometry analysis

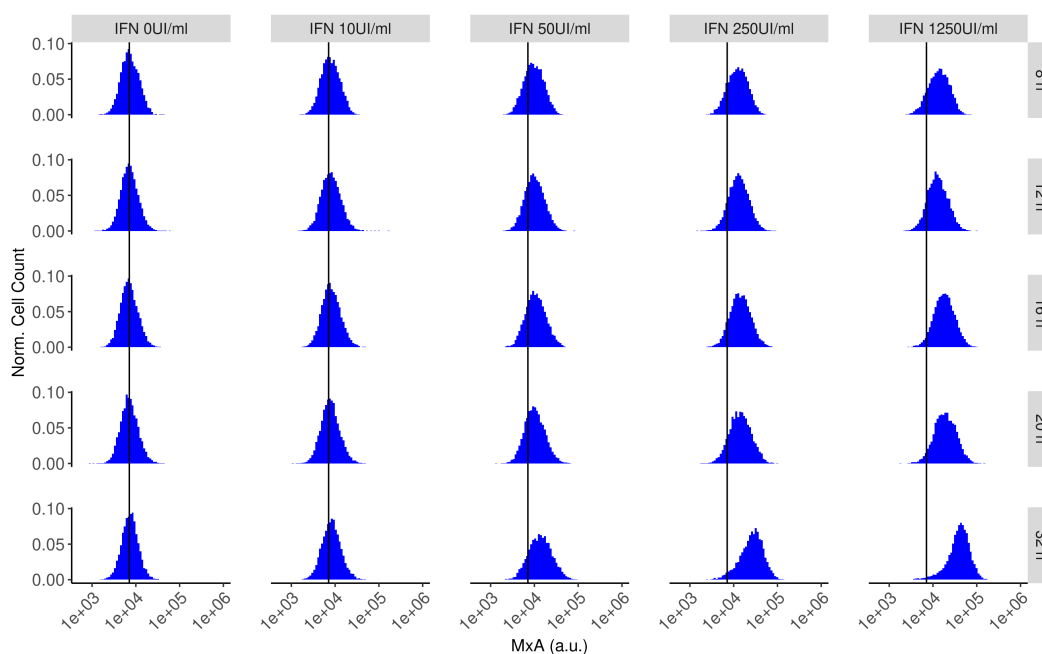

**Figure A. MxA flow cytometry data** The data shows the expression of MxA after IFN- $\alpha$  stimulation in a population of Huh7.5 cells. Distributions represent the flow cytometry measurements of MxA expression under control conditions (first column, no IFN treatment), subsequent columns represent the MxA expression after multiple IFN doses (from 10 to 1250 UI/mL of IFN- $\alpha$ ). In the different IFN treatments, the mean fluorescence level shifts from  $8 \times 10^3$  a.u. (arbitrary units of fluorescence) to  $4.5 \times 10^4$  a.u. for MxA.

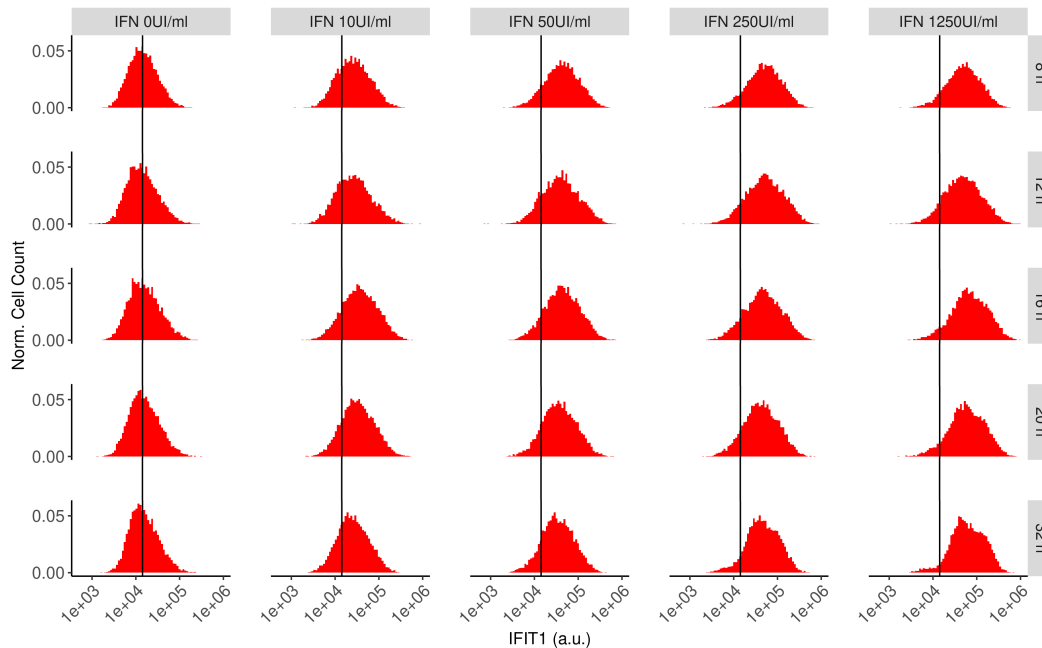

**Figure B. IFIT1 flow cytometry data** The data describes the expression of IFIT1 after IFN- $\alpha$  stimulation in a population of Huh7.5 cells. Distributions represent the flow cytometry measurements of MxA expression under control conditions (first column, no IFN treatment), subsequent columns represent the MxA expression after multiple IFN doses (from 10 to 1250 UI/mL of IFN- $\alpha$ ). In the different IFN treatments, the mean fluorescence level shifts from  $2 \times 10^4$  to  $9 \times 10^4$  a.u. for IFIT1.

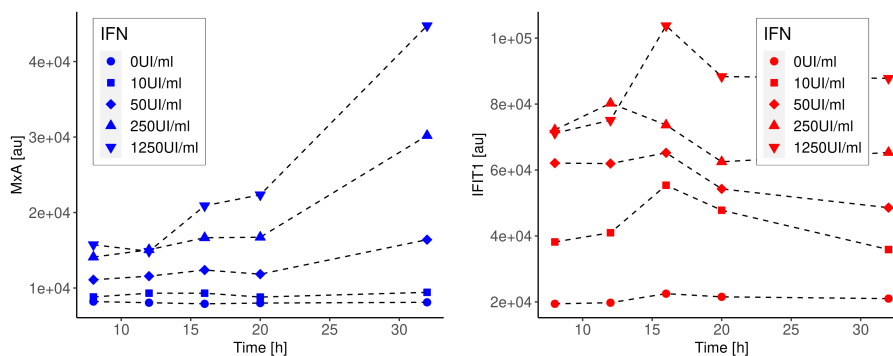

**Figure C. Temporal analysis of the IFN response.** The plot shows the mean values of the distributions given in Figs A and B. IFIT1 reaches its maximum response 16 hours after IFN stimulation, whereas the maximum response for MxA was obtained after 32 hours.

## 14 B Modeling biological systems

### 15 B.1 Stochastic COPASI Model

16 Receptor dynamics.

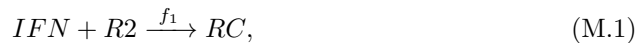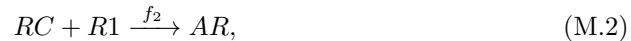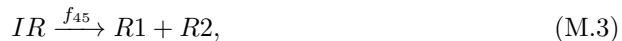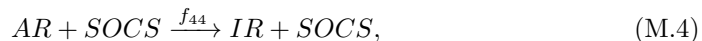

17 Receptor-dependent signal transduction.

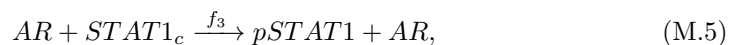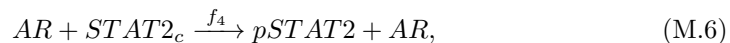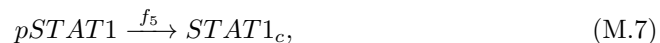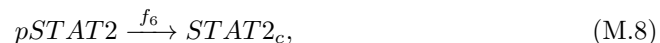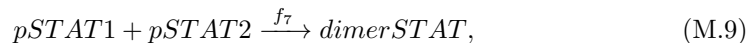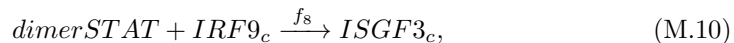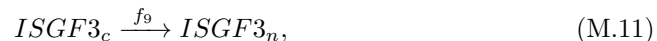

18 Receptor-independent signal transduction.

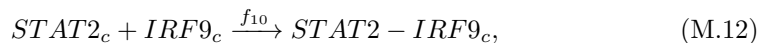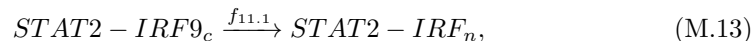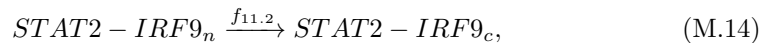

19 Promoter activation and inactivation.

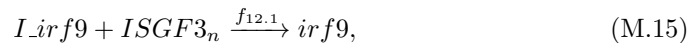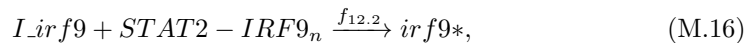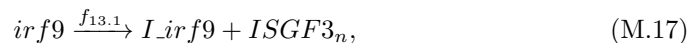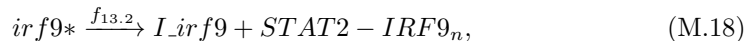

$$I\_socs + ISGF3_n \xrightarrow{f_{14.1}} socs, \quad (M.19)$$

$$I\_socs + STAT2 - IRF9_n \xrightarrow{f_{14.2}} socs*, \quad (M.20)$$

$$socs \xrightarrow{f_{15.1}} I\_socs + ISGF3_n, \quad (M.21)$$

$$socs* \xrightarrow{f_{15.2}} I\_socs + STAT2 - IRF9_n, \quad (M.22)$$

$$I\_mxa + ISGF3_n \xrightarrow{f_{16.1}} mxs, \quad (M.23)$$

$$I\_mxa + STAT2 - IRF9_n \xrightarrow{f_{16.2}} mxs*, \quad (M.24)$$

$$mxs \xrightarrow{f_{17.1}} I\_mxa + ISGF3_n, \quad (M.25)$$

$$mxs* \xrightarrow{f_{17.2}} I\_mxa + STAT2 - IRF9_n, \quad (M.26)$$

$$I\_ifit1 + ISGF3_n \xrightarrow{f_{18.1}} ifit1, \quad (M.27)$$

$$I\_ifit1 + STAT2 - IRF9_n \xrightarrow{f_{18.2}} ifit1*, \quad (M.28)$$

$$ifit1 \xrightarrow{f_{19.1}} I\_ifit1 + ISGF3_n, \quad (M.29)$$

$$ifit1* \xrightarrow{f_{19.2}} I\_ifit1 + STAT2 - IRF9_n, \quad (M.30)$$

20 Transcription.

$$irf9 \xrightarrow{f_{20.1}} irf9 + mIRF9_n, \quad (M.31)$$

$$irf9* \xrightarrow{f_{20.2}} irf9* + mIRF9_n, \quad (M.32)$$

$$socs \xrightarrow{f_{21.1}} socs + mSOCS_n, \quad (M.33)$$

$$socs* \xrightarrow{f_{21.2}} socs* + mSOCS_n, \quad (M.34)$$

$$mxs \xrightarrow{f_{22.1}} mxs + mMxA_n, \quad (M.35)$$

$$mxs* \xrightarrow{f_{22.2}} mxs* + mMxA_n, \quad (M.36)$$

$$ifit1 \xrightarrow{f_{23.1}} ifit1 + mIFIT1_n, \quad (M.37)$$

$$ifit1* \xrightarrow{f_{23.2}} ifit1* + mIFIT1_n, \quad (M.38)$$

21 Translocalization / Posttranscriptional Modifications.

$$mIRF9_n \xrightarrow{f_{24}} mIRF9_c, \quad (\text{M.39})$$

$$mSOCS_n \xrightarrow{f_{25}} mSOCS_c, \quad (\text{M.40})$$

$$mMxA_n \xrightarrow{f_{26}} mMxA_c, \quad (\text{M.41})$$

$$mIFIT1_n \xrightarrow{f_{27}} mIFIT1_c, \quad (\text{M.42})$$

22 mRNA degradation.

$$mIRF9_c \xrightarrow{f_{28}} \emptyset, \quad (\text{M.43})$$

$$mSOCS_c \xrightarrow{f_{29}} \emptyset, \quad (\text{M.44})$$

$$mMxA_c \xrightarrow{f_{30}} \emptyset, \quad (\text{M.45})$$

$$mIFIT1_c \xrightarrow{f_{31}} \emptyset, \quad (\text{M.46})$$

23 Translation.

$$mIRF9_c \xrightarrow{f_{32}} mIRF9 + IRF9_c, \quad (\text{M.47})$$

$$mSOCS_c \xrightarrow{f_{33}} mSOCS_c + SOCS, \quad (\text{M.48})$$

$$mMxA_c \xrightarrow{f_{34}} mMxA_c + MxA, \quad (\text{M.49})$$

$$mIFIT1_c \xrightarrow{f_{35}} mIFIT1_c + IFIT1, \quad (\text{M.50})$$

24 Protein degradation.

$$IRF9_c \xrightarrow{f_{36}} \emptyset, \quad (\text{M.51})$$

$$IRF9_n \xrightarrow{f_{36}} \emptyset, \quad (\text{M.52})$$

$$SOCS \xrightarrow{f_{37}} \emptyset, \quad (\text{M.53})$$

$$MxA \xrightarrow{f_{38}} \emptyset, \quad (\text{M.54})$$

$$IFIT1 \xrightarrow{f_{39}} \emptyset, \quad (\text{M.55})$$

$$IFN \xrightarrow{f_{46}} \emptyset, \quad (\text{M.56})$$

25 Transcription factor release and translocation.

$$ISGF3_n \xrightarrow{f_{40}} IRF9_n + STAT1_n + STAT2_n, \quad (\text{M.57})$$

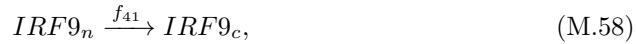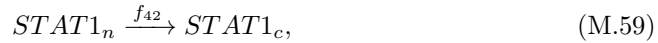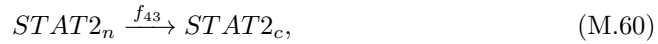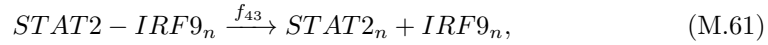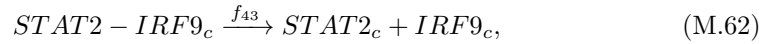

26 The reaction rates are given in Table A.

27

**Table A. Reaction rates considered in the model**

| Name       | Definition                                  | Name       | Definition                    |
|------------|---------------------------------------------|------------|-------------------------------|
| $f_1$      | $k_1 \cdot R2 \cdot IFN$                    | $f_{21.2}$ | $k_{21} \cdot socs*$          |
| $f_2$      | $k_2 \cdot RC \cdot R1$                     | $f_{22.1}$ | $k_{22} \cdot mxa$            |
| $f_3$      | $k_3 \cdot STAT1_c \cdot AR$                | $f_{22.2}$ | $k_{22} \cdot mxa*$           |
| $f_4$      | $k_4 \cdot STAT2_c \cdot AR$                | $f_{23.1}$ | $k_{23} \cdot ifit1$          |
| $f_5$      | $k_{5p} STAT1$                              | $f_{23.2}$ | $k_{23} \cdot *ifit1$         |
| $f_6$      | $k_{6p} STAT2$                              | $f_{24}$   | $k_{24} \cdot mIRF9_n$        |
| $f_7$      | $k_7 \cdot pSTAT1 \cdot pSTAT2$             | $f_{25}$   | $k_{25} \cdot mSOCs_n$        |
| $f_8$      | $k_8 \cdot dimerSTAT1 \cdot IRF9_c$         | $f_{26}$   | $k_{26} \cdot mMxA_n$         |
| $f_9$      | $k_9 \cdot ISGF3_c$                         | $f_{27}$   | $k_{27} \cdot mIFIT1_n$       |
| $f_{10}$   | $k_{10} \cdot STAT2_c \cdot IRF9_c$         | $f_{28}$   | $k_{28} \cdot mIRF9_c$        |
| $f_{11.1}$ | $k_{11.1} \cdot STAT2 - IRF9_c$             | $f_{29}$   | $k_{29} \cdot mSOCs_c$        |
| $f_{11.2}$ | $k_{11.2} \cdot STAT2 - IRF9_n$             | $f_{30}$   | $k_{30} \cdot mMxA_c$         |
| $f_{12.1}$ | $k_{12} \cdot Iirf9 \cdot ISGF3_n$          | $f_{31}$   | $k_{31} \cdot mIFIT1_c$       |
| $f_{12.2}$ | $k_{12} \cdot Iirf9 \cdot STAT2 - IRF9_n$   | $f_{28}$   | $k_{32} \cdot mIRF9_c$        |
| $f_{13.1}$ | $k_{13.1} \cdot irf9$                       | $f_{29}$   | $k_{33} \cdot mSOCs_c$        |
| $f_{13.2}$ | $k_{13.2} \cdot irf9*$                      | $f_{30}$   | $k_{34} \cdot mMxA_c$         |
| $f_{14.1}$ | $k_{14} \cdot I_socs \cdot ISGF3_n$         | $f_{31}$   | $k_{35} \cdot mIFIT1_c$       |
| $f_{14.2}$ | $k_{14} \cdot I_socs \cdot STAT2 - IRF9_n$  | $f_{36.1}$ | $k_{36} \cdot IRF9_c$         |
| $f_{15.1}$ | $k_{15.1} \cdot socs$                       | $f_{36.2}$ | $k_{36} \cdot IRF9_n$         |
| $f_{15.2}$ | $k_{15.2} \cdot socs*$                      | $f_{37}$   | $k_{37} \cdot SOCS$           |
| $f_{16.1}$ | $k_{16} \cdot I_mxa \cdot ISGF3_n$          | $f_{38}$   | $k_{38} \cdot MxA$            |
| $f_{16.2}$ | $k_{16} \cdot I_mxa \cdot STAT2 - IRF9_n$   | $f_{39}$   | $k_{39} \cdot IFIT1$          |
| $f_{17.1}$ | $k_{17.1} \cdot mxa$                        | $f_{40}$   | $k_{40} \cdot ISGF3_n$        |
| $f_{17.2}$ | $k_{17.2} \cdot mxa*$                       | $f_{41}$   | $k_{41} \cdot IRF9_n$         |
| $f_{18.1}$ | $k_{18} \cdot I_ifit1 \cdot ISGF3_n$        | $f_{42}$   | $k_{42} \cdot STAT1_n$        |
| $f_{18.2}$ | $k_{18} \cdot I_ifit1 \cdot STAT2 - IRF9_n$ | $f_{43}$   | $k_{43} \cdot STAT2_n$        |
| $f_{19.1}$ | $k_{19.1} \cdot ifit1$                      | $f_{44}$   | $k_{44} \cdot AR \cdot SOCS$  |
| $f_{19.2}$ | $k_{19.2} \cdot ifit1*$                     | $f_{45}$   | $k_{45} \cdot IR$             |
| $f_{20.1}$ | $k_{20} \cdot irf9$                         | $f_{46}$   | $k_{46} \cdot IFN$            |
| $f_{20.2}$ | $k_{20} \cdot irf9*$                        | $f_{47.1}$ | $k_{47} \cdot STAT2 - IRF9_n$ |
| $f_{21.1}$ | $k_{21} \cdot socs$                         | $f_{47.2}$ | $k_{47} \cdot STAT2 - IRF9_c$ |

## 28 B.2 Stochastic modeling

29 Considering a system of  $N$  different chemical species  $\mathbf{S} = \{S_1, \dots, S_N\}$ , the state of the  
 30 system is defined as the number of molecules of each element in  $\mathbf{S}$  at time  $t$ :  $\mathbf{X}(t) =$   
 31  $(X_1(t), \dots, X_N(t))$ . The evolution of the system is given by the interaction of the  
 32 chemical species through  $\mathbf{M}$  reaction channels  $\{R_1, \dots, R_M\}$ . Each reaction channel is  
 33 represented by the following general scheme:

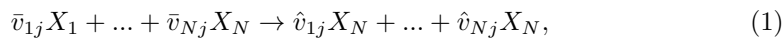

34 for  $j = 1, \dots, M$ , where  $v_{ij} = \hat{v}_{ij} - \bar{v}_{ij}$  are the reaction stoichiometries. The stoichiometry  
 35 matrix  $\mathbf{v}$  is composed of all the reaction stoichiometries.

36

37 Given the microscopic random processes that govern chemical reactions, it is possible  
 38 to describe the evolution of  $\mathbf{X}(t)$  as a homogeneous Markov process in continuous time.  
 39 Considering this framework, the Chemical Master Equation (CME) describes the prob-  
 40 ability that the system has a specific copy number of each  $S_i$  at a given point in the  
 41 future:

$$\frac{\partial P(\mathbf{X}, t)}{\partial t} = \sum_{j=1}^M \left[ a_j(\mathbf{X} - v_j)P(\mathbf{X} - v_j, t|X_0, t_0) - a_j(\mathbf{X})P(\mathbf{X}, t|X_0, t_0) \right] \quad (2)$$

42 where the two terms within brackets give the rate at which the probability of being in  
 43 state  $\mathbf{X}$  increases or decreases over time because of reactions into or out of state  $\mathbf{X}$ ,  
 44 respectively.  $a_j$  indicates the probability that the reaction  $R_j$  will occur in the next  
 45 infinitesimal interval  $[t, t + dt)$ .

### 46 B.3 Stochastic simulations

47 Calculating the PDE directly by solving the chemical master equation is in most cases  
 48 computationally infeasible. Therefore, in this study we approximated the PDE by  
 49 repeated stochastic simulation runs. Each simulation run results in one realisation  
 50 of a stochastic time series, and the combined runs let us estimate the evolution of the  
 51 probabilities of the system being in a certain state at various time points. For reasons of  
 52 computational efficiency we used an approximate stochastic simulation algorithm, the  
 53 adapted  $\tau$ -leap method [1]. In contrast to exact stochastic simulation methods, that  
 54 simulate each single reaction event, the  $\tau$ -leap methods estimate the number of reaction  
 55 events for each biochemical reaction in the model during a suitable chosen time step.  
 56 We use the method as implemented in the software COPASI [2], which is based on a  
 57 time step selection scheme and other improvements by Cao et al. [1].  
 58 In order to verify the appropriateness of the approximative simulation method, we  
 59 compared the distributions obtained by 1000 runs of exact simulation using the original  
 60 direct method [3] with distributions obtained from approximative simulations (which  
 61 are at least 2 orders of magnitude faster in this model). Fig D shows the differences in  
 62 the resulting distributions, which are neglectable in the context of this study.



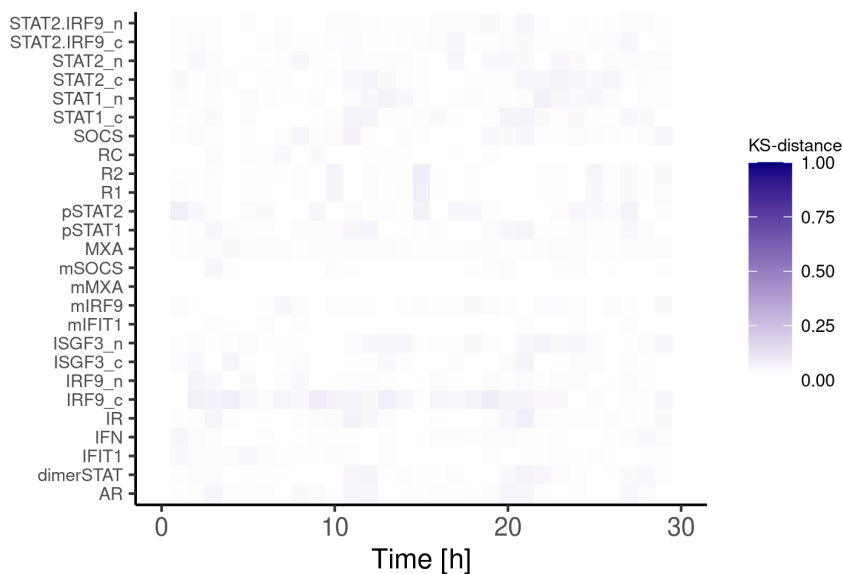

**Figure D. Comparison of simulation results using the exact direct method for stochastic simulation vs. the adapted  $\tau$ -leap method as used in this study.** Time dependent PDEs were estimated using 1000 simulations using the exact direct method and the adapted  $\tau$ -leap method, respectively. The heatmap shows the KS-distance for the two methods at different time points for different variables. The distances are below 0.05 for all variables and timepoints, which is not relevant in the context of this study.

#### 63 B.4 Statistical moments

64 Solving the CME or calculating the PDFs from multiple rounds of SSA can give full in-  
 65 formation regarding the probability of each state at any given time point. Nevertheless,  
 66 sometimes it is more convenient to collapse the full information to estimate some char-  
 67 acteristic properties from those distributions such as the statistical moments [4]. The  
 68 first statistical moment is known as the mean and is calculated as the sum of each value  
 69 weighted by its own probability, that is:

$$\mathbb{E}(X(t)) = \sum_{i=0}^{\infty} X_i P(X_i(t)) \quad (3)$$

70 The second statistical moment is also known as the variance, and higher moments can  
 71 be computed, but this will not be discussed in the manuscript.

## 72 C Parameter estimation strategy

73 The aim of the parameter estimation strategy is to find a unique parameter set that  
 74 can reproduce both the cell population data (time course data from immunoblotting  
 75 measurements) and the single-cell data (flow cytometry data). Given the different res-  
 76 olutions and time scales in the experimental data sets we divided our optimization  
 77 strategy in four steps that feedback each other until finding the final parameter values:  
 78 the first step was a literature search where initial parameter guesses or values ranges  
 79 were generated, the second step consisted in fitting the model under deterministic dy-  
 80 namics to the cell population data, the third step involved the fitting of the stochastic  
 81 version of the model with experimental flow cytometry distributions. The final fourth  
 82 step validates that the stochastic model with the fitted parameter set reproduces both  
 83 the cell population and single cell data. Concurrently, we estimated the system's ini-  
 84 tial condition with a similar optimization routine as the basal concentrations for many  
 85 species incorporated in the model were unknown: Following a literature search to deter-  
 86 mine or narrow down initial conditions (1), molecule numbers for  $\text{IRF9}_n$ ,  $\text{mIRF9}_c$  and  
 87  $\text{STAT2-IRF9}$  complexes as well as localisation distributions of  $\text{STAT2}$  were estimated  
 88 such that the model is in a steady state in absence of interferon under consideration  
 89 of literature knowledge such as the presence of nuclear retention signals and observed  
 90 localisation ratios (2). When fitting of the stochastic version of the model with experi-  
 91 mental flow cytometry distributions (3), initial ISG particle numbers were assigned to  
 92 the experimental FACS data of unstimulated cells using scaling factors (OP. 4-7). A  
 93 diagram of the fitting strategy is given in Fig E. Notice that with this strategy we were  
 94 able to fit the temporal response of the IFN system and the stochastic dynamics in the  
 95 final ISG expression.

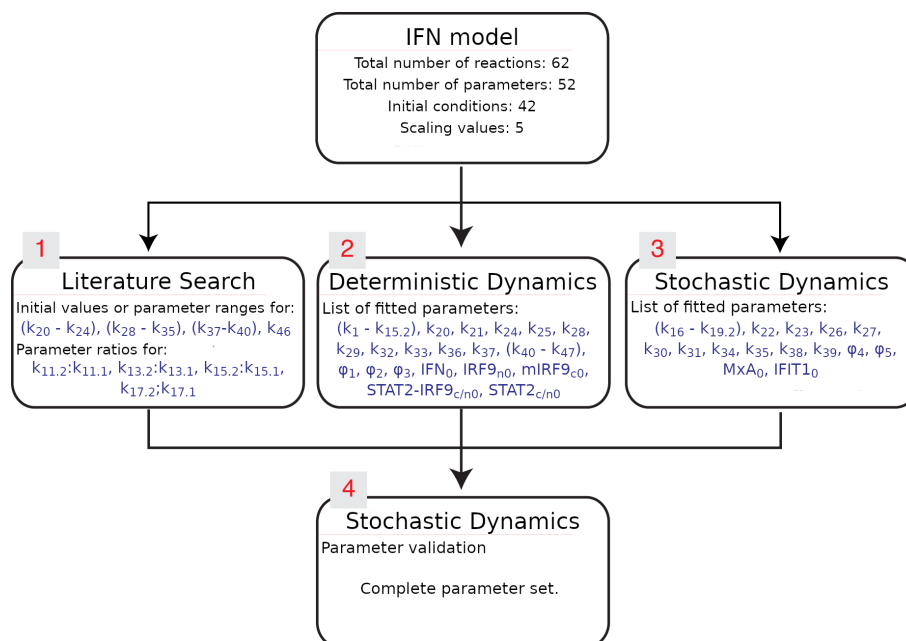

**Figure E. Parameter estimation strategy.** The parameter estimation strategy was divided into 4 different steps. The figure shows the parameters fitted at each step. The final model reproduces with a single parameter set the cell population and single-cell data. Parameters given in parenthesis represent a range of parameters. The list with the parameter values is given in Table 1, initial conditions are given in Table 3 of the main section.

## 96 C.1 Integrating experimental data and model dynamics

### 97 C.1.1 Time course data

98 Time course data were produced by Maiwald *et al.* [5]. The data described the temporal  
 99 dynamics of different elements of the JAK-STAT signaling pathway. Using quantitative  
 100 immunoblotting the dynamics of phosphorylated JAK1, pSTAT1 and nuclear IRF9 were  
 101 measured in Huh7.5 cells after stimulation with 500 UI/mL of IFN- $\alpha$  at different time  
 102 points for a total time of 180 min. The experimental measurements of phosphorylated  
 103 JAK1 ( $pJAK1^\dagger$ ) were mapped with active receptor (AR) in the model as follows:

$$pJAK1^\dagger(t_i) = \varphi_1 * (AR(t_i) - AR(t_0)), \quad (\text{OP.1})$$

104 where  $\varphi_1$  is an scaling factor.

105  
 106 Given that different complexes are detected by the used antibody against phosphory-  
 107 lated STAT1, the experimental measurements of cytoplasmic phosphorylated STAT1  
 108 ( $pSTAT1^\dagger$ ) were mapped with the different cytoplasmatic complexes of pSTAT1 that  
 109 are described in the model as follows:

$$pSTAT1^\dagger(t_i) = \varphi_2 * \left( pSTAT1(t_i) + dimerSTAT(t_i) + ISGF3_c(t_i) \right. \\ \left. - pSTAT1(t_0) - dimerSTAT(t_0) - ISGF3_c(t_0) \right), \quad (\text{OP.2})$$

110 where  $\varphi_2$  is an scaling factor.

111  
 112 The experimental measurements of nuclear IRF9 ( $IRF9^\dagger$ ) were mapped with the nuclear  
 113 complexes involving IRF9 in the model as follows:

$$IRF9^\dagger(t_i) = \varphi_3 * \left( ISGF3_n(t_i) + STAT2-IRF9_n(t_i) + IRF9_n(t_i) \right. \\ \left. - ISGF3_n(t_0) - STAT2-IRF9_n(t_0) - IRF9_n(t_0) \right), \quad (\text{OP.3})$$

114 where  $\varphi_3$  is an scaling factor.

### 116 C.1.2 Flow cytometry data

117 Experimental data describing expression of MxA and IFIT1 after IFN- $\alpha$  stimulation in  
 118 a population of Huh7.5 cells. Experiments were done in the following way: first, cells  
 119 were transfected with a BAC (Bacterial Artificial Chromosome) containing MxA and  
 120 reporter GFP and dGFP genes fused, subsequently cultures were treated with two con-  
 121 centrations of IFN- $\alpha$  (100 and 1250 UI/mL). For illustrative purposes we selected the  
 122 treatment with 250 UI/mL of IFN- $\alpha$ . Then, fluorescence in the cultures was monitored  
 123 using flow cytometry at different time points during 32 hours.

124  
 125 The experimental measurements of MxA ( $MxA^\dagger$ ) were mapped with the  $MxA$  in the  
 126 model as follows:

$$MxA^\dagger(t_i) = \varphi_4 * MxA(t_i), \quad (\text{OP.4})$$

127 where  $\varphi_4$  is an scaling factor.

128  
 129 The experimental measurements of IFIT1 ( $IFIT1^\dagger$ ) were mapped with the  $IFIT1$  in  
 130 the model as follows:

$$IFIT1^\dagger(t_i) = \varphi_5 * (IFIT1(t_i) + 65), \quad (\text{OP.5})$$

131 where  $\varphi_5$  is a scaling factor and 65 serves as numeric constant to compensate for  
 132 IFN-independent IFI1 expression through cross-talk (e.g. STAT1-independent Trans-  
 133 activation of ISG56 promoter by IRF-3 [6, 7]). Even though MxA is also affected by  
 134 IFN-independent cross-talks, no compensation was applied as its expression differs from  
 135 IFIT1 in being dependent on STAT1 signaling [7, 8] and due to measurements indicating  
 136 that IFN scores correlate strongly with monocyte MxA proteins [9, 10]

137

138 The initial particle numbers of MxA and IFIT1 of the model given in Table 3 of the  
 139 main section were calculated as follows:

$$MxA(t_0) = \text{mean}(MxA^\dagger(IFN_0))/(\varphi_4 * V_{Cyttoplasm}), \quad (\text{OP.6})$$

140

$$IFIT1(t_0) = \text{mean}(IFIT1^\dagger(IFN_0))/(\varphi_5 * V_{Cyttoplasm}), \quad (\text{OP.7})$$

141 where  $\varphi_4$  and  $\varphi_5$  are scaling factors. Note that for the stochastic simulations the re-  
 142 porter's initial conditions were sampled from a log-normal distribution which adequately  
 143 reproduces experimental data (Fig F) rather than taking the scaled experimental mean  
 144 expression.

**Table B. Scaling factors**

| Scaling Factor | Value                 |
|----------------|-----------------------|
| $\varphi_1$    | $1.14 \times 10^{-3}$ |
| $\varphi_2$    | $5.43 \times 10^{-5}$ |
| $\varphi_3$    | $1.07 \times 10^{-3}$ |
| $\varphi_4$    | 5.099                 |
| $\varphi_5$    | 29.62                 |

## 145 C.2 Comparing deterministic model and cell population data

146 The measurements of time course data represent the average dynamics of proteins in a  
 147 population of Huh7.5 cells. Those measurements were related to the the corresponding  
 148 observable chemical species in the model with a specific set of parameter values  $\theta =$   
 149  $\{\theta_1, \dots, \theta_d\}$ , using a squared differences functional:

$$F_D(\theta, S^O) = \sum_{i=1}^m \sum_{j=1}^n (S_{ij}^\dagger - S_{ij}^O(\theta))^2. \quad (\text{OP.8})$$

## 150 C.3 Fitting the stochastic system to flow cytometry data

151 Flow cytometry is a high-throughput technology that measures single-cell fluorescence  
 152 from labeled biomolecules through a detector system. By an automated process, it  
 153 measures thousands of cells at a time capturing in this way the cell-to-cell variability  
 154 in the culture. Measurements of the same cell population at different time points can  
 155 be taken and the temporal evolution of the whole population can be monitored. Given  
 156 the resolution obtained by flow cytometry and the large number of repetitions it is an  
 157 excellent source of data to fit and analyze stochastic models.

158

159 The process to fit the stochastic system to flow cytometry data was developed based on  
 160 Lillacci's [11] and Aguilera's works [12]. Commonly, flow cytometry measurements are  
 161 analysed by histograms or probability density functions (PDFs). However, a drawback  
 162 of these representations is that their shape is dependent on the number of bins used  
 163 for its construction. For this reason, cumulative density functions (CDFs) have been

164 suggested as more accurate representations of flow cytometry data [13]. The CDF of a  
 165 random variable  $x$  is the probability that the random variable is less than or equal to  
 166 some value, that is:  $F(a) = P(x \leq a)$  [13].

167

168 In our case, we build empirical CDF (ECDF) for experimental data and simulations re-  
 169 sults. First, having  $nm$  repetitions of single-cell experimental data from flow cytometry  
 170 measurements at  $I$  time points  $t_i$ ,  $i = 1, \dots, I$ , that is  $\mathbf{m}(t_i) = \{m_1(t_i), \dots, m_{nm}(t_i)\}$   
 171 ECDFs for the experimental data  $\hat{F}_e(\mathbf{m}(t_i))$  were built. In a similar way, considering  
 172 a specific set of parameter values  $\theta = \{\theta_1, \dots, \theta_d\}$ , we performed  $ns$  repetitions of the  
 173 stochastic simulations  $\mathbf{s}(t_i) = \{s_1(t_i), \dots, s_{ns}(t_i)\}$ . The total of those stochastic simu-  
 174 lations were used to build the ECDF for each  $t_i$  that is  $\hat{F}_s(\mathbf{s}(t_i), \theta)$ .

175

176 To calculate the distance between  $\hat{F}_e$  and  $\hat{F}_s$  we used the Kolmogorov distance ( $D_{KS}$ ),  
 177 that is the absolute difference between two ECDFs [13]. For  $\hat{F}_e$  and  $\hat{F}_s$  their Kolmogorov  
 178 distance is:

$$D_{KS} = \max_x |\hat{F}_e - \hat{F}_s| \quad (\text{OP.9})$$

179 Experimental data distributions came from measurements of tens of thousands of single  
 180 cells by flow cytometry, whereas distributions from the stochastic model requires  $ns$   
 181 stochastic simulations. Computing the model distribution using  $ns$  in the order of tens  
 182 of thousands is computationally expensive even for simple models. To reduce computa-  
 183 tional cost in our simulations we calculated a minimal number of stochastic simulations  
 184  $\hat{ns}$  needed to build the distribution with a quality good enough to be used during the  
 185 optimization strategy. An important finding introduced by Lillacci [11, 13] is the defini-  
 186 tion of a minimal number of simulations  $\hat{ns}$  needed to apply the Kolmogorov distance.  
 187 It is calculated using the properties of the Kolmogorov distribution as follows:

188

$$\hat{ns} = \left\lceil \frac{-\log(\frac{\alpha}{2})}{2\left(\epsilon - \sqrt{-\frac{1}{2 \cdot nm} \log \frac{\alpha}{2}}\right)^2} \right\rceil, \quad (\text{OP.10})$$

189 where  $\lceil x \rceil$  represents the closest integer to  $x$ .  $\alpha = 1 - \sqrt{1 - \beta}$  and  $\beta$  represent a fixed  
 190 confidence level,  $\epsilon$  represents the desired tolerance [13]. In Lillacci's implementations  
 191 typical values for  $\beta = 0.05$  (representing 95% confidence) and  $\epsilon = 0.05$  are used.

192 Since the experimentally obtained flow cytometry measurements suggest a logarithmic  
 193 normal distribution of protein concentrations in the unstimulated state, initial condi-  
 194 tions were sampled from a log-normal distribution (Fig F).

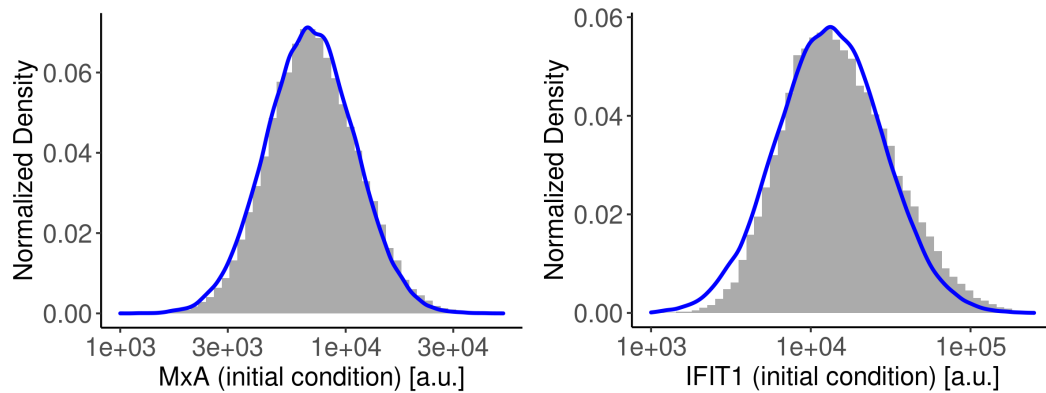

**Figure F.** The reporter’s initial conditions were sampled using a log-normal distribution (blue line) which adequately reproduces experimental data (histogram).

Time series data of all flow cytometry measurements of unstimulated cells (0 UI/mL IFN) were combined and its mean value and standard deviation calculated to determine the formula of the logarithmic normal distribution for basal expression. The lognormal distribution for MxA is characterized by a log mean value of 8.85 and a standard deviation on the log scale of 0.45, while IFIT1’s initial particle number is sampled from a lognormal distribution with a log mean of 9.48 and a log sd of 0.45. The IFIT initial particle number was adjusted with 65 molecules times scaling factor 5 to address for IFIT1 expression through cross-talk (see Section S3.1.2). The Kolmogorov-Smirnov distance  $D_{KS}$  between experiment and log-normal distribution is below 0.05. In the plot, the x-axis represents the fluorescence level in arbitrary units of fluorescence. The integral over the density (area under the curve) is normalized so that it equals one. Prior to that, it was tested whether the conditions for assuming a normal distribution were given.

195 **C.4 Parameter searches**

196 Parameter searches consisted in optimization routines based on genetic algorithms  
 197 (GA) [14, 15]. GAs mimic evolution and are based on the mutation, reproduction and  
 198 selection. By the continuous process of selecting the best parameters after each gener-  
 199 ation, the algorithm evolves towards a minimum in parameter space. Our optimization  
 200 strategy is based on Aguilera *et al.* [12]. The proposed method improves its performance  
 201 by selecting parameters values after comparing the similitude between the first statisti-  
 202 cal moment of the system and the first statistical moment in the experimental data  
 203 distribution. By this pre-selection of parameter values most of the original parameters  
 204 are rejected and the algorithms focus on the finding of parameters that reproduce the  
 205 observed distribution dynamics. This pre-step significantly reduces the computational  
 206 cost. For our optimization routine we implemented an population of 1000 individuals  
 207 for 15 generations. The following settings for genetic operators were chosen: random  
 208 (log-uniform) population of real values, linear-rank selection, single-point crossover and  
 209 log-uniform random mutation. As parameters for the algorithm we used an elitism rate  
 210  $v = 0.2$ , a crossover rate of 0.8 and a mutation rate  $\mu = 0.2$ . At the end of the gener-  
 211 ations the best solution of the algorithm was selected as  $\theta_{fit}$ . A pseudo-code for the GA  
 212 is given in Algorithm S2 and a graphical description is given in Fig G.

213

**Data:** High-throughput PDFs. Biochemical Model.

**Define:** Number of Free Parameters ( $\theta_{fp}$ ). Ranges for Parameter Values.

Number of Generations ( $G$ ). Population Size ( $PS$ ). Mutation Rate ( $\mu$ ). Rate of  
 Elitism ( $v$ ).

**Result:** Parameter values that best reproduce the experimental data.

**GENERATE** a initial population of random parameters.

**for**  $i = 1 : G$  **do**

$j = 1$  ;

**while**  $j < PS$  **do**

        Assign the  $j^{th}$  parameter set in the model;

        Run deterministic dynamics ;

        Test deterministic precondition ;

**if** *deterministic precondition is true* **then**

            RUN stochastic simulations ;

            Objective Function ( $OF$ ) evaluation ;

$fitness = -OF$

**else**

            Reject the  $j^{th}$  parameter set ;

            Set  $OF =$  deterministic evaluation value ;

$fitness = -OF$ ;

**end**

$j = j + 1$

**end**

**RANK** individuals according to its *fitness* ;

**SELECT** a number of parental individuals ( $PI$ ),  $np = PS \times \epsilon$  ;

**RECOMBINE**  $PI$  until generate a offspring number,  $no = PS - PI$  ;

**MUTATE** each offspring with a number of mutations,  $nm = \theta_{fp} \times \mu$ ;

**end**

**Algorithm S1:** Genetic algorithm with a deterministic precondition

214

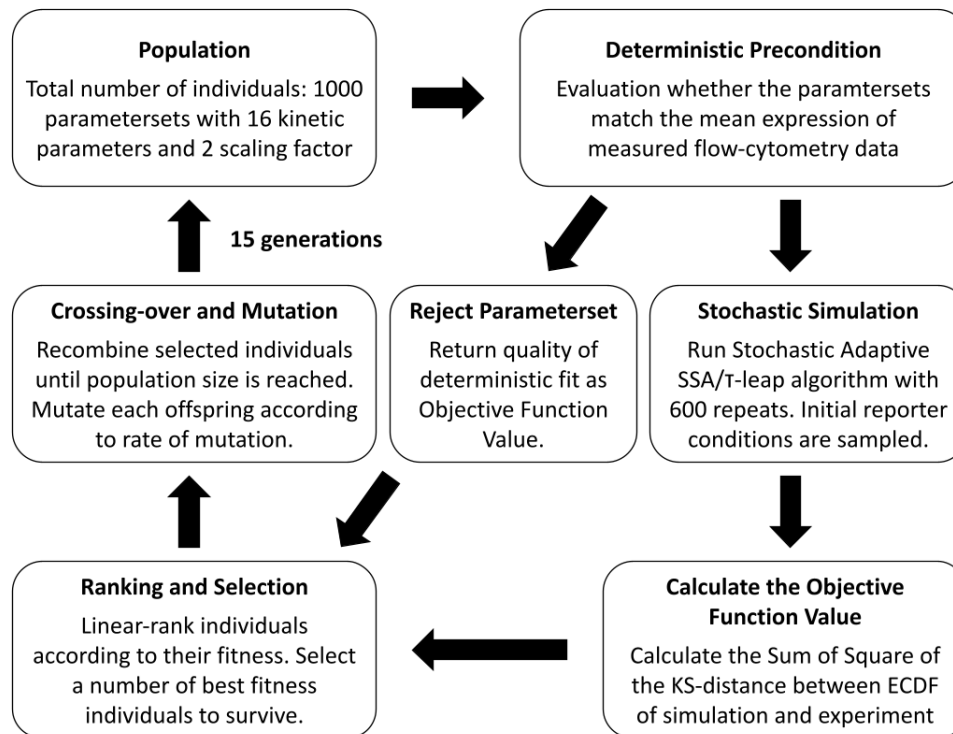

**Figure G. Genetic algorithm strategy with deterministic preconditions.**

Genetic algorithms are stochastic search algorithms that resemble natural selection and sexual reproduction by mimicking the biological mechanisms of selection, recombination and mutation. This algorithm is made of a population of individuals (parameter sets), and each contains a genome that is defined by the number of parameters to optimize. The individuals are ranked after solving the objective function, and a population of parental individuals is selected according to an elitism rate ( $v$ ). New individuals (offspring) are generated by pairing and recombining the parental genomes (cross-over). Variability is introduced in the population by adding mutations in the new individuals according to a given mutation rate ( $\mu$ ). By the continuous process of selecting the best parameters after each generation, the algorithm evolves towards a minimum in parameter space. Our optimization strategy is based on Aguilera *et al.* [12]. The proposed method improves its performance by selecting parameters values after comparing the similitude between the first statistical moment of the system and the first statistical moment in the experimental data distribution. By this pre-selection of parameter values most of the original parameters are rejected and the algorithms focus on the finding of parameters that reproduce the observed distribution dynamics. This pre-step significantly reduces the computational cost.



## 215 C.5 Parameter estimation results

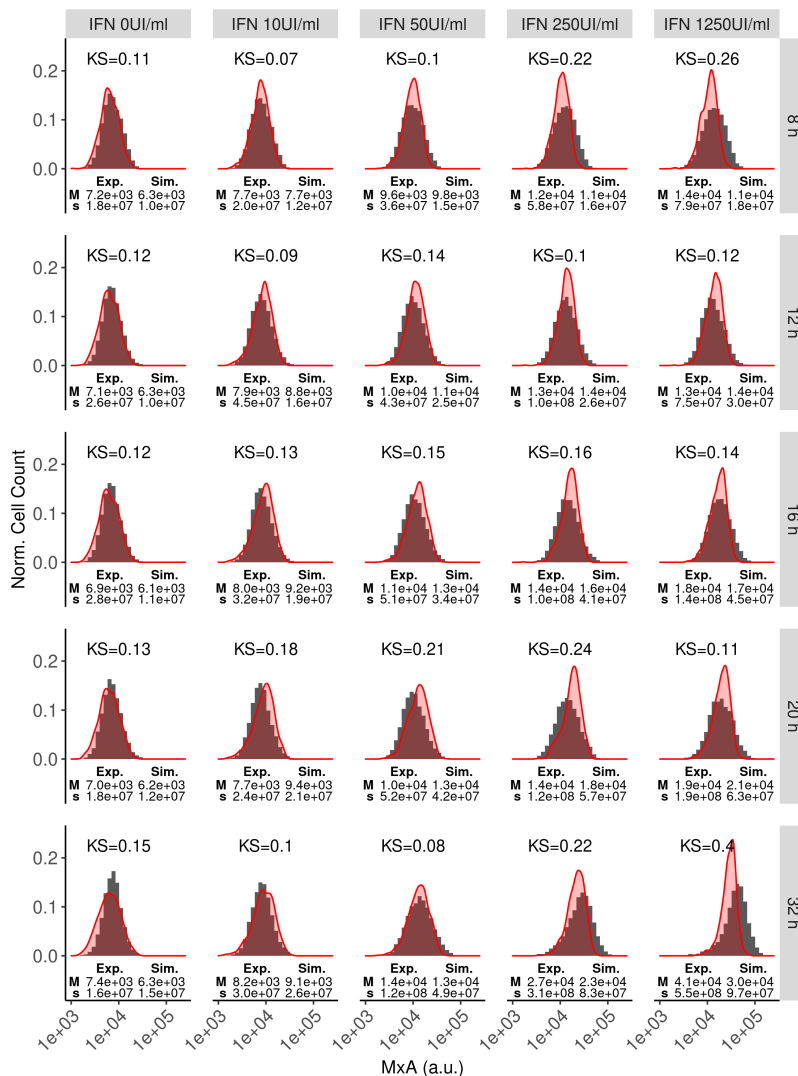

**Figure H. Fitted MxA reporter single-cell data to the stochastic model.**

The parameterized model can fully capture the heterogeneity in the IFN response for the surrogate marker MxA at five different time points upon stimulation with various IFN concentrations ranging from 0 – 1250 UI/mL. For each distribution, the median (M) and variance (s) are given. A switch-like expression is observed for single-cell trajectories, whilst the whole population displayed unimodality. At the higher IFN concentrations, our model underestimates the variance of the distributions.

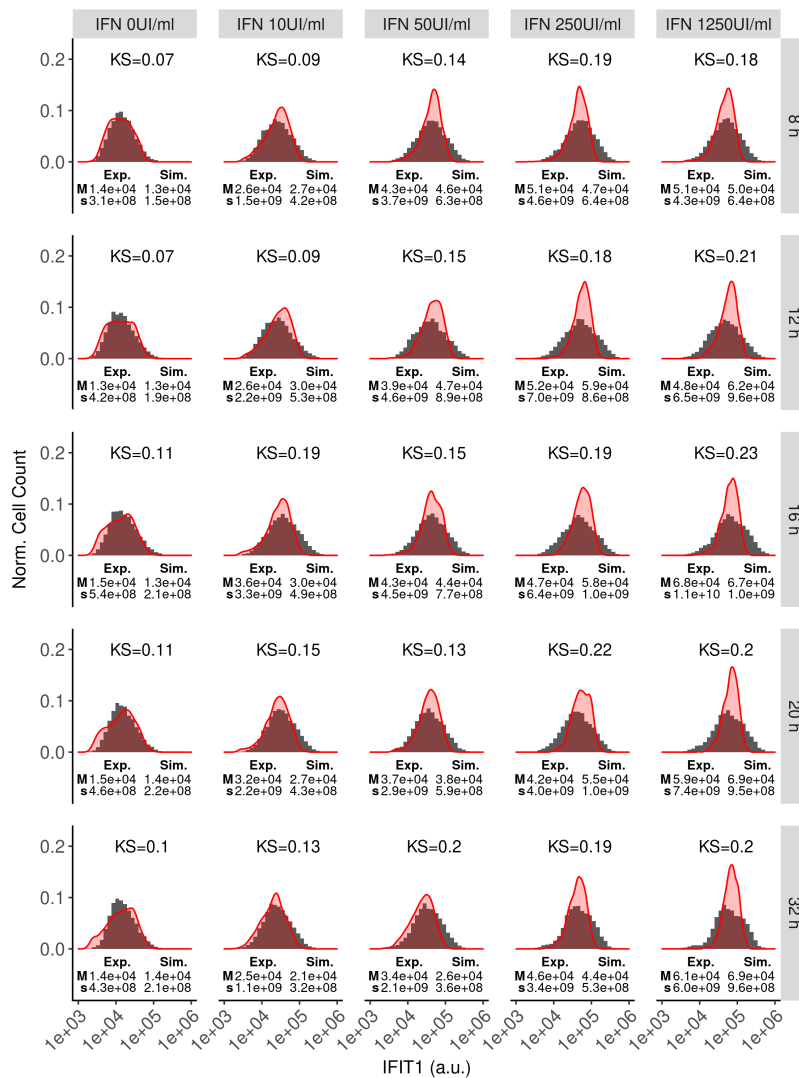

**Figure I. Fitted IFIT1 reporter single-cell data to the stochastic model.**

The parameterized model can fully capture the heterogeneity in the IFN response for the surrogate marker MxA at five different time points upon stimulation with various IFN concentrations ranging from 0 – 1250 UI/mL. For each distribution, the median (M) and variance (s) are given. A switch-like expression is observed for single-cell trajectories, whilst the whole population displayed unimodality. Again, our model underestimates the variance at higher IFN concentrations.

216 **D Effect of extrinsic noise in the signaling pathway**

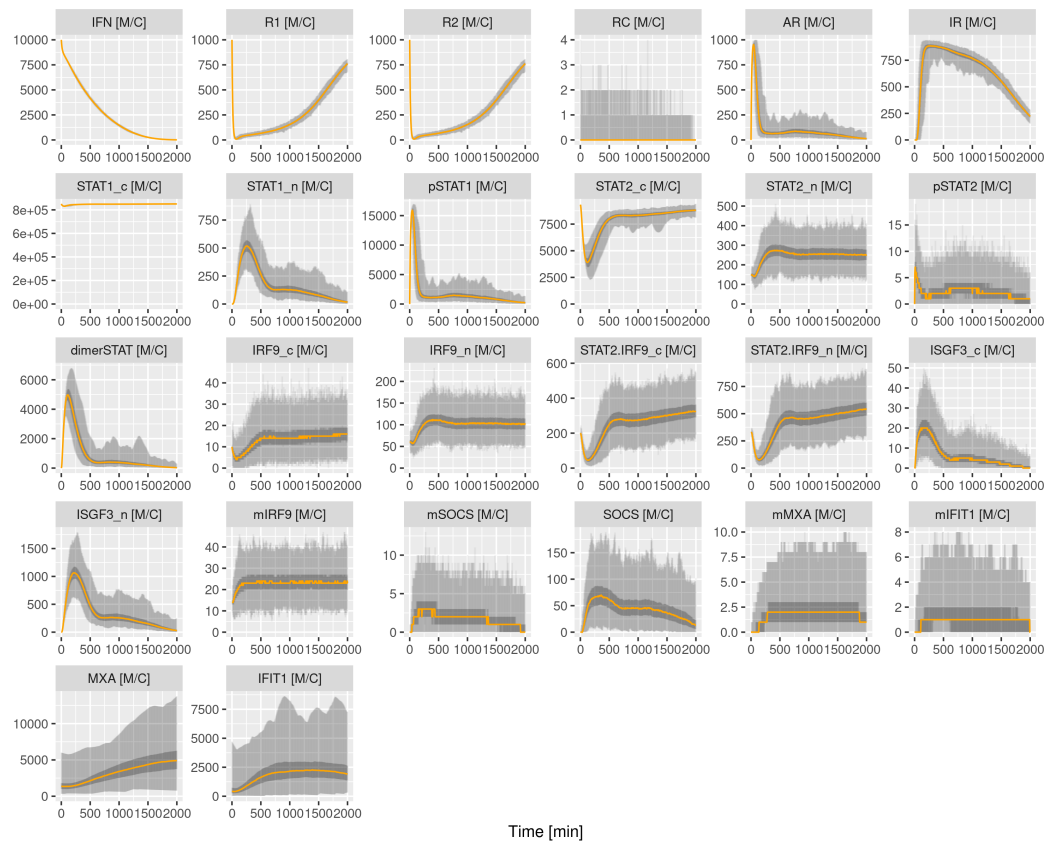

**Figure J. Model temporal stochastic dynamics without extrinsic noise.**

Time course data describing the temporal dynamics of all species involved in the JAK-STAT signaling pathway. The plots represent the median values calculated with the repetitions of the stochastic model (orange lines). The y-axis has units of Molecules per Cell (M/C). The range of the distributions is indicated by the light gray ribbons, while dark gray ribbons represent 50% KI intervals.

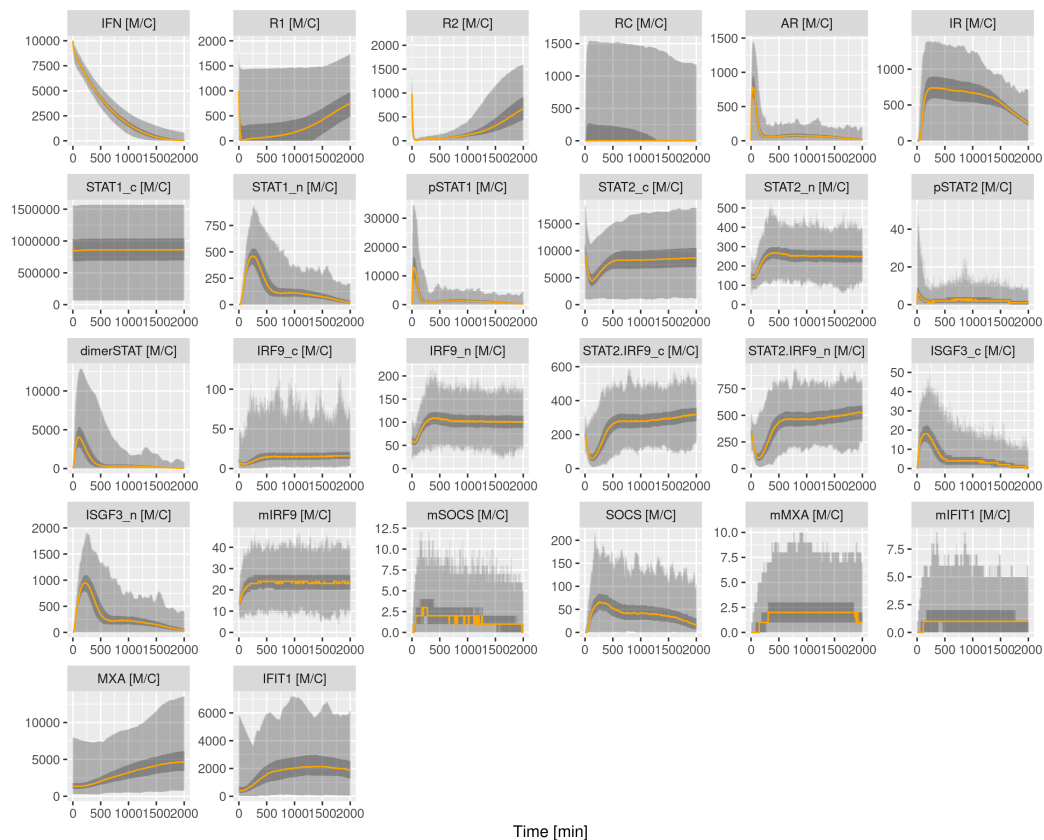

**Figure K. Model temporal stochastic dynamics for a system with extrinsic noise ( $\sigma = 0.3$ ).**

Time course data describing the temporal dynamics of all species involved in the JAK-STAT signaling pathway. The plots represent the median values calculated with the repetitions of the stochastic model (orange lines). The y-axis has units of Molecules per Cell (M/C). The range of the distributions is indicated by the light gray ribbons, while dark gray ribbons represent 50% KI intervals.

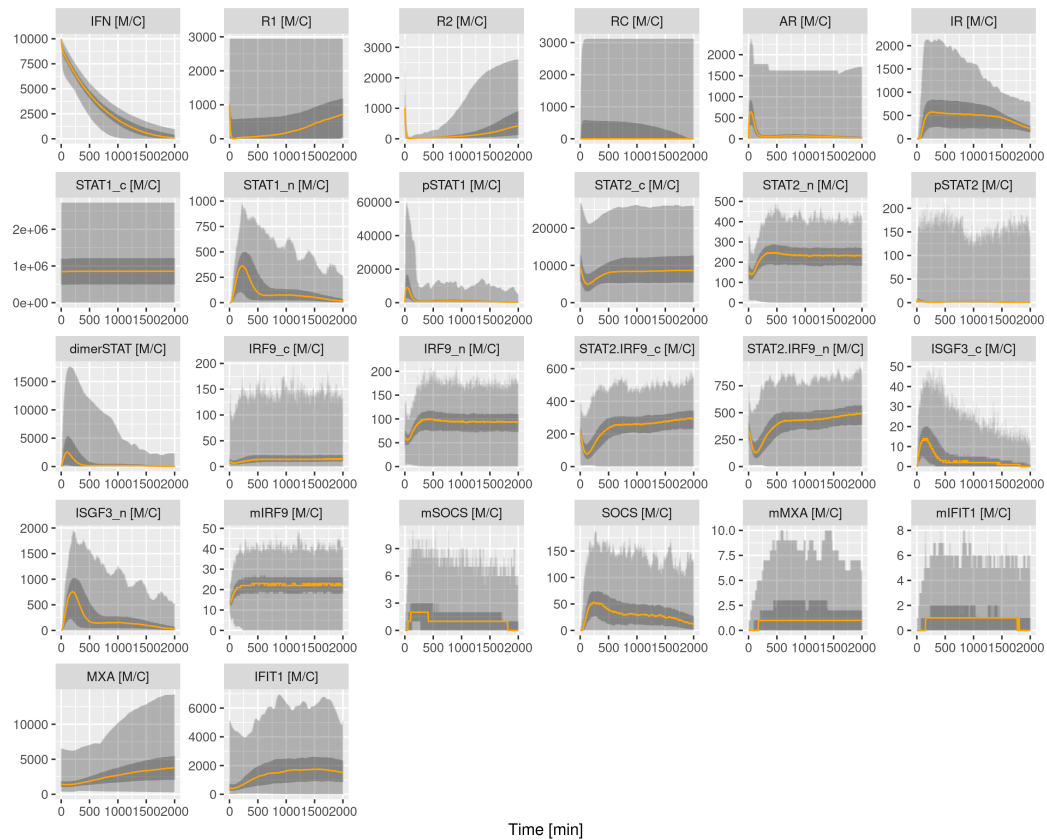

**Figure L. Model temporal stochastic dynamics for a system with extrinsic noise ( $\sigma = 0.6$ ).**

Time course data describing the temporal dynamics of all species involved in the JAK-STAT signaling pathway. The plots represent the median values calculated with the repetitions of the stochastic model (orange lines). The y-axis has units of Molecules per Cell (M/C). The range of the distributions is indicated by the light gray ribbons, while dark gray ribbons represent 50% KI intervals.

## 217 E Promoter analysis for MxA and IFIT1

218 MxA promoter sequence

219

220 MxA promoter contains two functional IRES sites (marked in red in the following se-  
221 quence) that have been experimentally proved to be activated by ISGF3. [16,17].

222

```
223 TCATCAGTTAAGGCTGTTTTACTTCTTTTTGTGGATCTTCAGTTACTTTAGGCCATCTGGATGTATACCTGCAAGTC
224 ACAGGGGATGCGATGGCCTGGCCTGGGATGCGATGGCCTGGCCTGACAACTATTACCTATGTTATGTTTATTATTTT
225 AAGCTTTATTACTATTATTTATTTATTTTATTTTCTTCCACACACCCGTTTCCACCCCTGGAGAGGCCAGAT
226 GAGCCAGACTCCAGGGAGGCTAGAAGTGGGCAAGGGGAAACGGGAAAGGAGGAAGATGGTATGGGTGTGCCTGGT
227 TAGGGGTGGGAGTGTGGACGGAGTTCGGGACAAGAGGGGCTCTGCAGCCATTGGCACACAATGCCTGGGAGTCCC
228 TGCTGGTGTGGGATCATCCAGTGAGCCCTGGGAGGGAAGTGAAGACCCCAATTACCAATGCATCTGTTTTCAA
229 ACCGACGGGGGAAGGACATGCCTAGGTTCAAGGATACGTGCAGGCTTGGATGACTCCGGGCCATTAGGGAGCCTC
230 CGGAGCACCTTGATCCTCAGACGGGCTGATGAAACGAGCATCTGATTACAGCAGGCTGGGTTCCGGGCCGAGAAC
231 CTGCGTCTCCCGAGTTCCCGCGAGGCAAGTGTGCAGGTGCGGGGCCAGGAGCTAGGTTTCGTTCTGCGCCG
232 GAGCCGCCCTCAGCACAGGTCTGTGAGTTTCATTCTTCGCGGCGGGGGCGGGGCTGGGCGGGGTGAAAGAG
233 GCGAAGCGAGAGCGGA
```

234

235 IFIT1 promoter sequence

236

237 IFIT1 promoter contains two functional IRES sites (marked in red in the following  
238 sequence) that have been experimentally proved to be activated by ISGF3. [18].

```
239 TTTTAGACGGAGTCTCGCTCTGTCCACAGACTGGAGTACAGTGGTGTGATCTCGGCTCACTGCAACCTCGCCTCC
240 CAGGTTCAAGCAATTCCCCTGCCTCAGCCTCTCGAGTAGGTGGGACTACAGGTGCACACCACCACACCAGCTAAT
241 TTTTGTATTTTAGTAGAGAGGGGTTTCACCATGTTGGCCACGATGGTCTCCATCTCCTGACCTTGTATCCGCC
242 CACCTTGGCCTCCCAAAGTGTGGGACTACAGGCATGAGCCACCGCACCCAGCCAAGAATCATTATTTTAACTTG
243 ATGACTGAAAATAATAATAATAATAGTTACCACTTATTTGCATGCTTCTATGTGCCAGGTAGTTGCTAACTATTTA
244 AACTCAAATTCATGAACTGTAGTGGAGGTTGTAAGTGAATTTGATTGAGAAATGACAGTGTCCATGATGGAGCAAT
245 AGAGGGCTCTCTATTTCAAACCATACCTCCTTGCTTTTACCTCCTGCCTAAGTCAATCAGGGGTTAGAAGGCTTCT
246 AGGTATTGGTCTCTTTCCTTCATTTCCTAAACCAGATTGGTTGCTTATTTCCGTCAAGCTGAAACCAAAGTAAGCA
247 ACCAAAAAGCAACCAGCAACCAAAGCCTTGTTACTCAATTAATTAAGAGTAGATTTTATATTTGATAGTAGGTT
248 CCTTCTAAATATAGAACTGAAAATAGAGCTATCTCCTTCAATTCTCCTTTTTCTGTGATTCATCCAGAATCCAG
249 CCACCAACTGCCACAATAGGCAGCAATGGACTGATGTTCTTTAGGGAGGACGTGAATCTCGTTCCAAATGCTGGCC
250 AGTCATTGGGTTTCTGCAGCACTAGAAACATCTATGGTTGAGGTCTGCAGTTTATCTGTTTAAAAATAGAAACAA
251 AGTTTCATTCCCACCCCCCGTCCAGCAGGAATCCGCTAGCTTTAGTTTCACTTCCCCTTTCGGTTTCCTTAG
252 TTCCAACCT
```

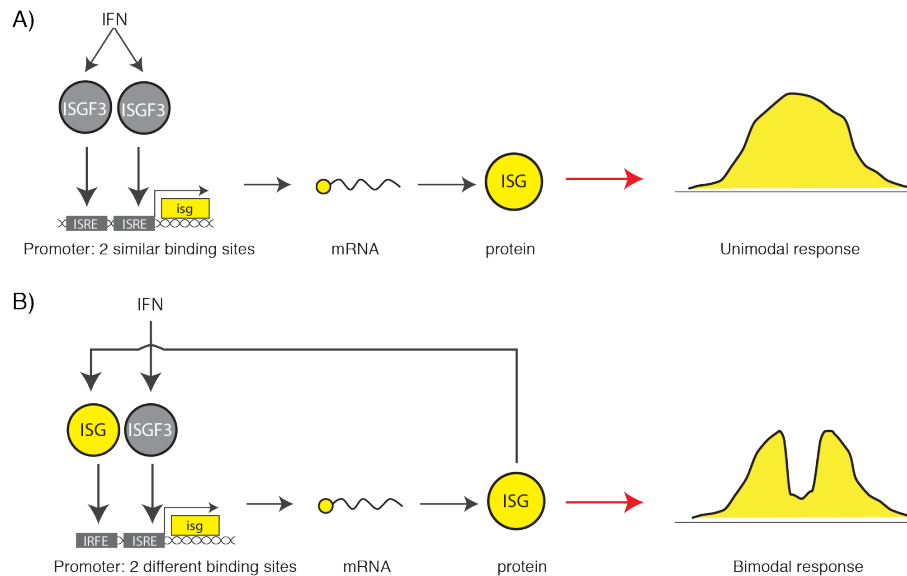

**Figure M. ISG promoter architectures and gene expression dynamics.**

Different promoter architectures in the ISG may explain the particular IFN response.

**A)** MxA and IFIT1 promoters only contain two transcription binding sites for ISGF3, and cooperativity has not been proved to take place during IFN type-I responses [18]. The lack of cooperative behavior in the MxA and IFIT1 promoters can explain the observed graded (unimodal) response. **B)** IRF7 promoter contains two different transcription factors binding sites (ISRE and IRF-E) that are activated by ISGF3 and a IRF7 dimer, respectively. Bimodality (all-or-none switch response) in IRF7 expression can be justified by circuit with a positive feedback loop and the non-linearity caused by the complex activation of its receptor [12,19].

253 **F Basal state**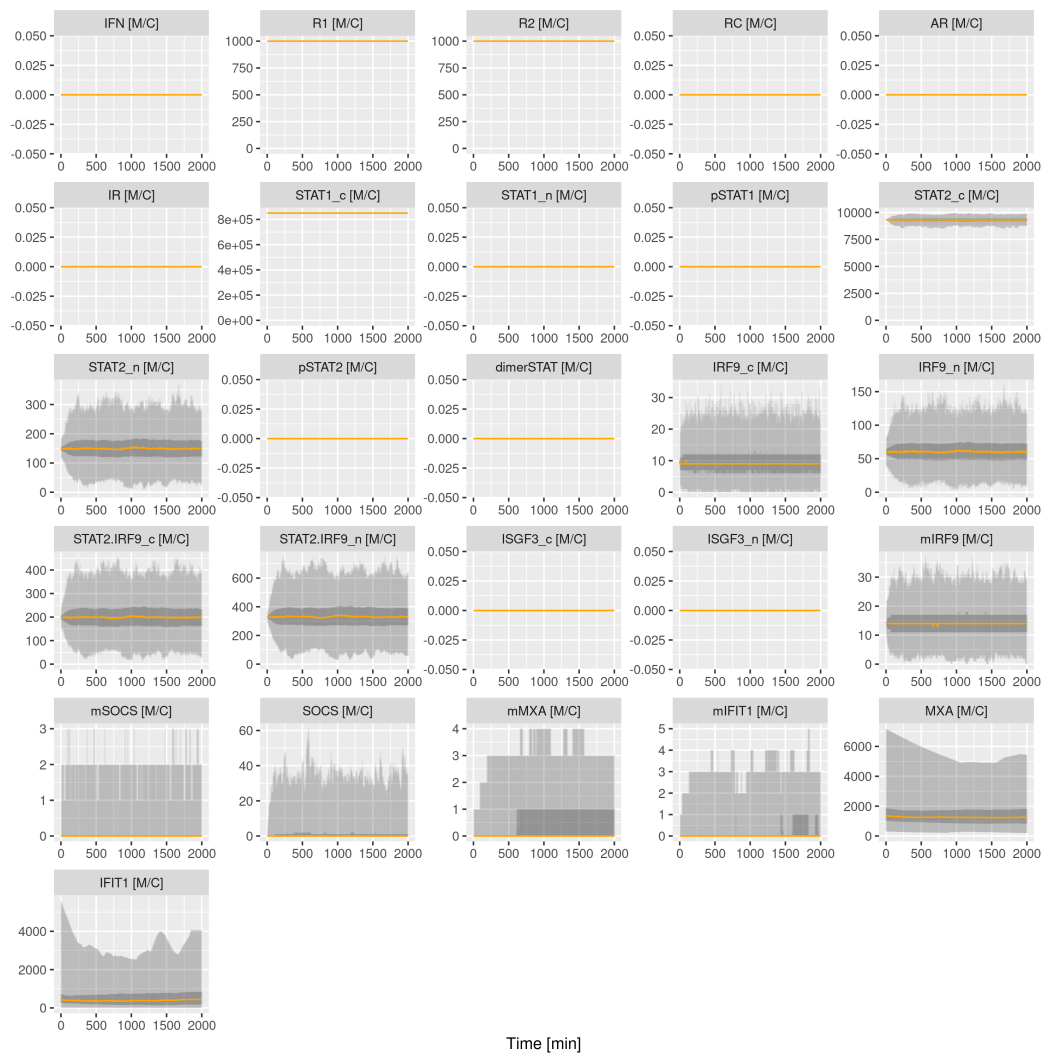

**Figure N. Model temporal stochastic dynamics for a system without IFN treatment (basal state).**

Time course data describing the temporal dynamics of all species involved in the JAK-STAT signaling pathway. The plots represent the median values calculated with the repetitions of the stochastic model (orange lines). The y-axis has units of Molecules per Cell (M/C). The range of the distributions is indicated by the light gray ribbons, while dark gray ribbons represent 50% KI intervals.

254 **G Effect of nucleus sizes on stochastic dynamics**



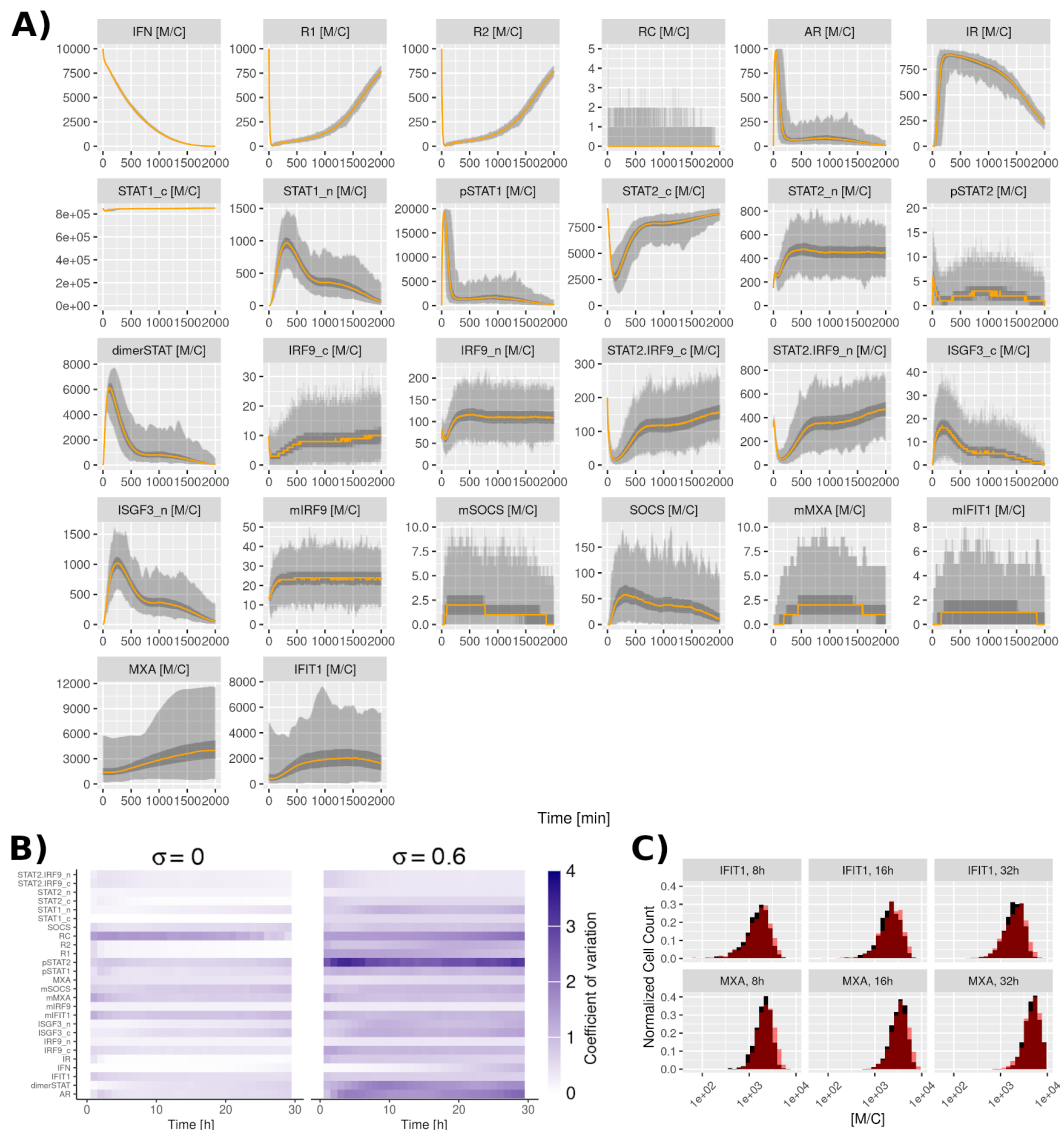

**Figure O. Stochastic dynamics of cells with a nuclear-to-cytoplasmic ratio of 27% (cf. 13.5% for healthy hepatocytes).**

**A)** Model temporal stochastic dynamics for a system without extrinsic noise. Time course data describing the temporal dynamics of all species involved in the JAK-STAT signaling pathway. The plots represent the median values calculated with the repetitions of the stochastic model (orange lines). The y-axis has units of Molecules per Cell (M/C). The range of the distributions is indicated by the light gray ribbons, while dark gray ribbons represent 50% KI intervals. **B)** Variability in the JAK-STAT signaling pathway was measured during different time points and for all the elements that form the pathway. The effects of extrinsic noise in the system were calculated by the coefficient of variation ( $cv = \sigma_S / (\mu_S + 0.1)$ ), where the subindex  $s$  represents the species in the pathway). In the plot the colorbar varies between 0 (white color) and larger than 4 (blue color), dark colors represent high variability in the dynamics of the studied species. The plots are consistent with those where a N:C ratio of 13.5% was assumed (Fig 5B). **C)** Stochastic simulations of different time points after IFN stimulation displaying a correct agreement in shape and location for multiple nuclear-cytoplasmic ratios. Simulated time-dependent distributions were computed by solving our model under stochastic dynamics using a distribution of values as initial conditions and repeating the simulations 1,000 times assuming a N:C ratio of 13.5% (black histogram) and 27% (red histogram), respectively. The red histogram is scaled by 24% to compensate for shifted steady state conditions.

## 255 H Abbreviations

256 AR, active Interferon receptor; a.u., arbitrary units; BAC, bacterial artificial chromo-  
257 some; CDF, cumulative density function; dimerSTAT, heterodimer made by phosphory-  
258 lated forms of STAT1 and STAT2; FACS, fluorescence activated flow cytometry; IFIT1,  
259 Interferon-induced protein with tetratricopeptide repeats 1; IFN, interferon; IR, in-  
260 active interferon receptor; IRF9, Interferon regulatory factor 9; ISG, IFN-stimulated  
261 gene; ISGF3, Interferon-stimulated gene factor 3; GA, genetic algorithm; GFP, green  
262 fluorescent protein; JAK, Janus kinase; KS-distance, Kolmogorov-Smirnov distance;  
263 MxA, Interferon-induced GTP-binding protein MxA; CDF, cumulative density func-  
264 tion; pSTAT, phospho-signal transducer and activator of transcription; R1, Interferon  
265 receptor subunit 1; R2, Interferon receptor subunit 2; RC, Interferon receptor complex;  
266 SOCS, Suppressor of cytokine signaling; STAT, signal transducer and activator of tran-  
267 scription; SSA, stochastic simulation algorithm; UI, International Units.

268

269 **Supplementary References**

- 270 1. Cao Y, Gillespie DT, Petzold LR. Adaptive explicit-implicit tau-leaping method  
271 with automatic tau selection. *Journal of Chemical Physics*. 2007;126(22).  
272 doi:10.1063/1.2745299.
- 273 2. Hoops S, Sahle S, Gauges R, Lee C, Pahle J, Simus N, et al. COPASI—a COM-  
274 plex PATHway SIMulator. *Bioinformatics (Oxford, England)*. 2006;22(24):3067–  
275 74. doi:10.1093/bioinformatics/btl485.
- 276 3. Gillespie DT. The chemical Langevin equation. *The Journal of Chemical Physics*.  
277 2000;113(1):297–306.
- 278 4. Schnoerr D, Sanguinetti G, Grima R. Comparison of different moment-closure  
279 approximations for stochastic chemical kinetics. *The Journal of chemical physics*.  
280 2015;143(18):11B610\_1.
- 281 5. Maiwald T, Schneider A, Busch H, Sahle S, Gretz N, Weiss TS, et al. Combining  
282 theoretical analysis and experimental data generation reveals IRF9 as a crucial  
283 factor for accelerating interferon  $\alpha$ -induced early antiviral signalling. *FEBS jour-  
284 nal*. 2010;277(22):4741–4754.
- 285 6. Grandvaux N, Servant MJ, tenOever B, Sen GC, Balachandran S, Barber GN,  
286 et al. Transcriptional profiling of interferon regulatory factor 3 target genes:  
287 direct involvement in the regulation of interferon-stimulated genes. *Journal of  
288 virology*. 2002;76(11). doi:10.1128/jvi.76.11.5532-5539.2002.
- 289 7. Ashley CL, Abendroth A, McSharry BP, Slobedman B. Interferon-  
290 Independent Upregulation of Interferon-Stimulated Genes during Human Cy-  
291 tomegalovirus Infection is Dependent on IRF3 Expression. *Viruses*. 2019;11(3).  
292 doi:10.3390/v11030246.
- 293 8. Holzinger D, Jorns C, Stertz S, Boisson-Dupuis S, Thimme R, Weidmann M,  
294 et al. Induction of MxA Gene Expression by Influenza A Virus Requires Type  
295 I or Type III Interferon Signaling. *Journal of Virology*. 2007;81(14):7776–7785.  
296 doi:10.1128/JVI.00546-06.
- 297 9. Lambers WM, de Leeuw K, Doornbos-van der Meer B, Diercks GFH, Bootsma  
298 H, Westra J. Interferon score is increased in incomplete systemic lupus erythe-  
299 matosus and correlates with myxovirus-resistance protein A in blood and skin.  
300 *Arthritis Res Ther*. 2019;21. doi:10.1186/s13075-019-2034-4.
- 301 10. Maria NI, Brkic Z, Waris M, van Helden-Meeuwsen CG, Heezen K, van de Merwe  
302 JP, et al. MxA as a clinically applicable biomarker for identifying systemic inter-  
303 feron type I in primary Sjögren’s syndrome. *Annals of the Rheumatic Diseases*.  
304 2014;73(6):1052–1059. doi:10.1136/annrheumdis-2012-202552.
- 305 11. Lillacci G, Khammash M. The signal within the noise: efficient inference of  
306 stochastic gene regulation models using fluorescence histograms and stochastic  
307 simulations. *Bioinformatics*. 2013;29(18):2311–2319.
- 308 12. Aguilera LU, Zimmer C, Ursula K. A New Efficient Approach to Fit Stochastic  
309 Models on the Basis of High-throughput Experimental Data Using a Model of  
310 IRF7 Gene Expression as Case Study. *BMC Systems Biology*. 2017;11(26).
- 311 13. Lillacci G, Khammash M. Model selection in stochastic chemical reaction net-  
312 works using flow cytometry data. In: 2011 50th IEEE Conference on Decision  
313 and Control and European Control Conference. IEEE; 2011. p. 1680–1685.

- 314 14. Scrucca L. GA: A Package for Genetic Algorithms in R. *Journal of Statistical*  
315 *Software*. 2013;53(4):1–37. doi:10.18637/jss.v053.i04.
- 316 15. Scrucca L. On Some Extensions to GA Package: Hybrid Optimisation, Paralleli-  
317 sation and Islands Evolution. *The R Journal*. 2017; p. 187–206. doi:10.32614/RJ-  
318 2017-008.
- 319 16. Ronni T, Matikainen S, Lehtonen A, Palvimo J, Dellis J, Van Eylen F, et al. The  
320 proximal interferon-stimulated response elements are essential for interferon re-  
321 sponsiveness: a promoter analysis of the antiviral MxA gene. *Journal of interferon*  
322 *& cytokine research*. 1998;18(9):773–781.
- 323 17. Nakade K, Handa H, Nagata K. Promoter structure of the MxA gene that confers  
324 resistance to influenza virus. *FEBS letters*. 1997;418(3):315–318.
- 325 18. Begitt A, Droescher M, Meyer T, Schmid CD, Baker M, Antunes F, et al. STAT1-  
326 cooperative DNA binding distinguishes type 1 from type 2 interferon signaling.  
327 *Nature immunology*. 2014;15(2):168–76. doi:10.1038/ni.2794.
- 328 19. Rand U, Rinas M, Schwerk J, Nöhren G, Linnes M, Kröger A, et al. Multi-  
329 layered stochasticity and paracrine signal propagation shape the type-I interferon  
330 response. *Molecular systems biology*. 2012;8(1):584.
